# Supplementary material for: Episodic disability questionnaire (EDQ) measurement properties among adults living with HIV in Canada, Ireland, United Kingdom, and United States
Source: Springer Nature journal article supplement (doi:10.1186/s12879-023-08958-7), 2024-01-10
Supplement: MOESM1 [file 26614558]

**Additional File 1 – Episodic Disability Questionnaire (EDQ) Items**

| Physical Domain                       |                                                            |
|---------------------------------------|------------------------------------------------------------|
| Item #                                | Item                                                       |
| 1                                     | I feel fatigued (or tired) when doing my usual activities. |
| 2                                     | I have headaches.                                          |
| 3                                     | I have aches or pains.                                     |
| 4                                     | I have numbness or tingling in my hands or feet.           |
| 5                                     | I have shortness of breath.                                |
| 6                                     | I feel nauseous.*                                          |
| 7                                     | I have fever, chills, or sweats.                           |
| 8                                     | I have muscle cramps.                                      |
| 9                                     | I have trouble sleeping.                                   |
| 10                                    | I feel dizzy.                                              |
| <b>Physical Total Number of Items</b> | <b>10 items</b>                                            |

| Cognitive Domain                       |                                                                                     |
|----------------------------------------|-------------------------------------------------------------------------------------|
| Item #                                 | Item                                                                                |
| 11                                     | I have trouble remembering things like appointments and when to take my medication. |
| 12                                     | I have trouble thinking clearly.                                                    |
| 13                                     | I have trouble concentrating.                                                       |
| <b>Cognitive Total Number of Items</b> | <b>3 items</b>                                                                      |

| Mental-Emotional Domain                       |                                  |
|-----------------------------------------------|----------------------------------|
| Item #                                        | Item                             |
| 14                                            | I feel anxious.                  |
| 15                                            | I feel sad, down, or depressed.  |
| 16                                            | I am afraid for my future.       |
| 17                                            | I lack confidence around others. |
| 18                                            | I feel lonely.                   |
| <b>Mental-Emotional Total Number of Items</b> | <b>5 items</b>                   |

| Uncertainty or Worry about the Future Domain |                                                                         |
|----------------------------------------------|-------------------------------------------------------------------------|
| Item #                                       | Item                                                                    |
| 19                                           | I worry about my future health.                                         |
| 20                                           | I worry about my lab (blood) or other test results (or investigations). |
| 21                                           | I worry about the side effects of treatments (including medications).   |
| 22                                           | I worry about my income or financial security.                          |
| 23                                           | I worry what might happen to my family and friends if I get sick.       |
| <b>Uncertainty Total Number of Items</b>     | <b>5 items</b>                                                          |

| Day-to-Day Activities Domain     |                                                                                                       |
|----------------------------------|-------------------------------------------------------------------------------------------------------|
| Item #                           | Item                                                                                                  |
| 24                               | I am unsteady on my feet.                                                                             |
| 25                               | I have trouble walking or climbing stairs.                                                            |
| 26                               | I have trouble doing household chores such as cleaning, doing dishes, laundry, and cooking.           |
| 27                               | I have trouble taking part in leisure or recreational activities, such as exercise or dancing.        |
| 28                               | I have trouble getting out to do errands, such as grocery shopping, banking, or doctor's appointments |
| <b>Day Total Number of Items</b> | <b>5 items</b>                                                                                        |

Additional File 1 – Episodic Disability Questionnaire (EDQ) Items

| Social Inclusion Domain                       |                                                                                                                                                                 |
|-----------------------------------------------|-----------------------------------------------------------------------------------------------------------------------------------------------------------------|
| Item #                                        | Item                                                                                                                                                            |
| 29                                            | I find hard to meet the needs of those I care for (such as children, parents, grandparents, partners, or pets). (0=not at all or not applicable)                |
| 30                                            | I feel that my work or volunteer performance is limited because of my illness (0=not at all or not applicable).                                                 |
| 31                                            | I struggle to maintain safe and stable housing.*                                                                                                                |
| 32                                            | I find it hard to ask others for help when go through an episode of illness.                                                                                    |
| 33                                            | I find it hard to start new, intimate, sexual relationships. (0=not at all or not applicable)*                                                                  |
| 34                                            | I tend to isolate myself from others.                                                                                                                           |
| 35                                            | Because of my financial situation, I find it hard to take part in leisure or recreational activities such as going to the movies, out to dinner or on vacation. |
| <b>Social Inclusion Total Number of Items</b> | <b>7 items</b>                                                                                                                                                  |

| Good Day or Bad Day Question |                                                                                                                                                                                                                                                                 |
|------------------------------|-----------------------------------------------------------------------------------------------------------------------------------------------------------------------------------------------------------------------------------------------------------------|
| Item #                       | Item                                                                                                                                                                                                                                                            |
| 36                           | People living with long-term health conditions sometimes talk about having ‘good days’ and ‘bad days’. This refers to the ‘ups and downs’ or periods of wellness and illness.<br>In terms of your overall health, are you having a good day or a bad day today? |

**LEGEND:** \**Presence and Severity Scales:* Response options are 0-4 for all items with the exception of Item #6 (response options 0-3) and Item #31 and #33 (response options 0=2).

*Episodic Scale:* For each item, respondents are asked, ‘Has this challenge fluctuated (or changed) over the past week? Response options: Yes or No.
