# Supplementary material for: Episodic disability questionnaire (EDQ) measurement properties among adults living with HIV in Canada, Ireland, United Kingdom, and United States
Source: Springer Nature journal article supplement (doi:10.1186/s12879-023-08958-7), 2024-01-10
Supplement: MOESM2 [file 26614558]

**Additional file 2 - Participant Characteristic and EDQ Differences for Participants who Completed T2 EDQ and Did Not Complete T2 EDQ**

| Characteristic                                                                                                 | Full Sample<br>(n=359) | Did not Complete T2<br>(n=38) | Completed T2<br>(n=321) | p-value | Statistical Test |
|----------------------------------------------------------------------------------------------------------------|------------------------|-------------------------------|-------------------------|---------|------------------|
| <b>Age</b>                                                                                                     |                        |                               |                         | 0.29    | Kruskal Wallis   |
| Mean (sd)                                                                                                      | 50.6 (11.8)            | 48.7 (13.8)                   | 50.9 (11.5)             |         |                  |
| Median (Min,Max)                                                                                               | 51 (20, 82)            | 48 (25, 79)                   | 52 (20, 82)             |         |                  |
| Missing                                                                                                        | 6                      | 1                             | 5                       |         |                  |
| <b>Gender</b>                                                                                                  |                        |                               |                         | 0.83    | Fisher Exact     |
| Woman: Cis-Woman                                                                                               | 40 (11)                | 4 (11)                        | 36 (11)                 |         |                  |
| Man: Cis-Man                                                                                                   | 293 (83)               | 32 (86)                       | 261 (82)                |         |                  |
| All Other*                                                                                                     | 21 (6)                 | 1 (3)                         | 20 (6)                  |         |                  |
| Missing                                                                                                        | 5                      | 1                             | 4                       |         |                  |
| <b>Sex</b>                                                                                                     |                        |                               |                         | 0.12    | Fisher Exact     |
| Female                                                                                                         | 40 (11)                | 4 (11)                        | 36 (11)                 |         |                  |
| Male                                                                                                           | 314 (88)               | 32 (86)                       | 282 (89)                |         |                  |
| Intersex                                                                                                       | 1 (0)                  | 1 (3)                         | 0 (0)                   |         |                  |
| Missing                                                                                                        | 4                      | 1                             | 3                       |         |                  |
| <b>Relationship status</b>                                                                                     |                        |                               |                         | 0.60    | Chi Sq           |
| Single                                                                                                         | 196 (58)               | 17 (50)                       | 179 (59)                |         |                  |
| Married or common law                                                                                          | 88 (26)                | 10 (29)                       | 78 (26)                 |         |                  |
| Separated or divorced or widowed                                                                               | 55 (16)                | 7 (21)                        | 48 (16)                 |         |                  |
| Missing                                                                                                        | 20                     | 4                             | 16                      |         |                  |
| <b>Have children</b>                                                                                           |                        |                               |                         | 0.85    | Chi Sq           |
| Yes                                                                                                            | 86 (24)                | 8 (22)                        | 78 (25)                 |         |                  |
| No                                                                                                             | 269 (76)               | 29 (78)                       | 240 (75)                |         |                  |
| Missing                                                                                                        | 4                      | 1                             | 3                       |         |                  |
| <b>Live alone</b>                                                                                              |                        |                               |                         | 0.19    | Chi Sq           |
| Yes                                                                                                            | 186 (52)               | 15 (41)                       | 171 (53)                |         |                  |
| No                                                                                                             | 171 (48)               | 22 (59)                       | 149 (47)                |         |                  |
| Missing                                                                                                        | 2                      | 0                             | 1                       |         |                  |
| <b>Source of Income</b>                                                                                        |                        |                               |                         | 0.14    | Fisher Exact     |
| Employment (Full, Part-Time, or Self)                                                                          | 177 (50)               | 22 (59)                       | 155 (48)                |         |                  |
| Income Support (e.g. Disability, Welfare, Worker's Compensation, Employment Insurance or Long Term Disability) | 121 (34)               | 7 (19)                        | 114 (36)                |         |                  |
| Pension, Student Loans, or Savings                                                                             | 41 (11)                | 5 (14)                        | 36 (11)                 |         |                  |
| Under the table work or Street Related Work (e. g. panhandling)                                                | 3 (1)                  | 1 (3)                         | 2 (1)                   |         |                  |
| Other                                                                                                          | 15 (4)                 | 2 (5)                         | 13 (4)                  |         |                  |
| Missing                                                                                                        | 2                      | 1                             | 1                       |         |                  |

Additional file 2 –Participant Characteristic and EDQ Differences for Participants who Completed T2 EDQ and Did Not Complete T2 EDQ

| Characteristic                                                                                                            | Full Sample<br>(n=359) | Did not Complete T2<br>(n=38) | Completed T2<br>(n=321) | p-value | Statistical Test  |
|---------------------------------------------------------------------------------------------------------------------------|------------------------|-------------------------------|-------------------------|---------|-------------------|
| <b>Employment status</b>                                                                                                  |                        |                               |                         | 0.85    | Fisher Exact      |
| Employed (Full time or Part time)                                                                                         | 167 (47)               | 19 (54)                       | 148 (46)                |         |                   |
| Student, Retired or Volunteering                                                                                          | 59 (17)                | 5 (14)                        | 54 (17)                 |         |                   |
| Unemployed or On Disability                                                                                               | 124 (35)               | 11 (31)                       | 113 (35)                |         |                   |
| Other                                                                                                                     | 5 (1)                  | 0 (0)                         | 5 (2)                   |         |                   |
| Missing                                                                                                                   | 4                      | 3                             | 1                       |         |                   |
| <b>Highest level of education</b>                                                                                         |                        |                               |                         | 0.38    | Chi Sq            |
| No formal education; secondary school completed                                                                           | 88 (25)                | 7 (19)                        | 81 (25)                 |         |                   |
| Completed trade or technical training (received certification /diploma) or completed college (received degree or diploma) | 132 (37)               | 12 (32)                       | 120 (38)                |         |                   |
| Completed university (received degree) or postgraduate education                                                          | 137 (38)               | 18 (49)                       | 119 (37)                |         |                   |
| Missing                                                                                                                   | 2                      | 1                             | 1                       |         |                   |
| <b>Race White</b>                                                                                                         |                        |                               |                         | 0.096   | Chi Sq            |
| Yes                                                                                                                       | 255 (81)               | 22 (69)                       | 233 (83)                |         |                   |
| No                                                                                                                        | 59 (19)                | 10 (31)                       | 49 (17)                 |         |                   |
| Missing                                                                                                                   | 45                     | 6                             | 39                      |         |                   |
| <b>Year of HIV diagnosis</b>                                                                                              |                        |                               |                         | 0.60    | Wilcoxon Rank Sum |
| Mean (sd)                                                                                                                 | 2004 (10)              | 2006 (8)                      | 2004 (11)               |         |                   |
| Median (Min,Max)                                                                                                          | 2005 (1980, 2021)      | 2006 (1996, 2020)             | 2005 (1980, 2021)       |         |                   |
| Missing                                                                                                                   | 115                    | 16                            | 99                      |         |                   |
| <b>In HIV care</b>                                                                                                        |                        |                               |                         | 1.00    | Fisher Exact      |
| Yes                                                                                                                       | 339 (95)               | 35 (95)                       | 304 (95)                |         |                   |
| No                                                                                                                        | 18 (5)                 | 2 (5)                         | 16 (5)                  |         |                   |
| Missing                                                                                                                   | 2                      | 1                             | 1                       |         |                   |
| <b>Antiretroviral use</b>                                                                                                 |                        |                               |                         | 0.48    | Fisher Exact      |
| Yes                                                                                                                       | 351 (98)               | 36 (97)                       | 315 (98)                |         |                   |
| No                                                                                                                        | 6 (2)                  | 1 (3)                         | 5 (2)                   |         |                   |
| Missing                                                                                                                   | 2                      | 1                             | 1                       |         |                   |
| <b>Undetectable viral load</b>                                                                                            |                        |                               |                         | 0.092   | Fisher Exact      |
| Yes                                                                                                                       | 328 (93)               | 35 (100)                      | 293 (92)                |         |                   |
| No                                                                                                                        | 26 (7)                 | 0 (0)                         | 26 (8)                  |         |                   |
| Missing                                                                                                                   | 5                      | 3                             | 2                       |         |                   |
| <b>Concurrent health condition – addiction or substance use disorder</b>                                                  |                        |                               |                         | 1.00    | Chi Sq            |
| No                                                                                                                        | 276 (78)               | 28 (78)                       | 248 (78)                |         |                   |
| Yes                                                                                                                       | 77 (22)                | 8 (22)                        | 69 (22)                 |         |                   |
| Missing                                                                                                                   | 6                      | 2                             | 4                       |         |                   |
| <b>Concurrent health condition – chronic joint pain</b>                                                                   |                        |                               |                         | 0.11    | Chi Sq            |
| No                                                                                                                        | 233 (67)               | 29 (81)                       | 204 (66)                |         |                   |
| Yes                                                                                                                       | 113 (33)               | 7 (19)                        | 106 (34)                |         |                   |
| Missing                                                                                                                   | 13                     | 2                             | 11                      |         |                   |

Additional file 2 –Participant Characteristic and EDQ Differences for Participants who Completed T2 EDQ and Did Not Complete T2 EDQ

| Characteristic                                                                     | Full Sample<br>(n=359) | Did not Complete T2<br>(n=38) | Completed T2<br>(n=321) | p-value | Statistical Test |
|------------------------------------------------------------------------------------|------------------------|-------------------------------|-------------------------|---------|------------------|
| <b>Concurrent health condition – chronic neuropathic pain</b>                      |                        |                               |                         | 0.43    | Chi Sq           |
| No                                                                                 | 266 (77)               | 30 (83)                       | 236 (76)                |         |                  |
| Yes                                                                                | 81 (23)                | 6 (17)                        | 75 (24)                 |         |                  |
| Missing                                                                            | 12                     | 2                             | 10                      |         |                  |
| <b>Concurrent health condition – chronic soft tissue pain</b>                      |                        |                               |                         | 0.69    | Chi Sq           |
| No                                                                                 | 247 (71)               | 27 (75)                       | 220 (70)                |         |                  |
| Yes                                                                                | 102 (29)               | 9 (25)                        | 93 (30)                 |         |                  |
| Missing                                                                            | 10                     | 2                             | 8                       |         |                  |
| <b>Concurrent health condition – cognitive decline</b>                             |                        |                               |                         | 0.81    | Chi Sq           |
| No                                                                                 | 254 (73)               | 25 (69)                       | 229 (73)                |         |                  |
| Yes                                                                                | 96 (27)                | 11 (31)                       | 85 (27)                 |         |                  |
| Missing                                                                            | 9                      | 2                             | 7                       |         |                  |
| <b>Concurrent health condition – gastrointestinal conditions</b>                   |                        |                               |                         | 0.16    | Chi Sq           |
| No                                                                                 | 240 (69)               | 29 (81)                       | 211 (68)                |         |                  |
| Yes                                                                                | 108 (31)               | 7 (19)                        | 101 (32)                |         |                  |
| Missing                                                                            | 11                     | 2                             | 9                       |         |                  |
| <b>Concurrent health condition – high blood pressure</b>                           |                        |                               |                         | 0.094   | Chi Sq           |
| No                                                                                 | 247 (71)               | 31 (84)                       | 216 (69)                |         |                  |
| Yes                                                                                | 103 (29)               | 6 (16)                        | 97 (31)                 |         |                  |
| Missing                                                                            | 9                      | 1                             | 8                       |         |                  |
| <b>Concurrent health condition – high cholesterol</b>                              |                        |                               |                         | 0.047   | Chi Sq           |
| No                                                                                 | 236 (68)               | 31 (84)                       | 205 (66)                |         |                  |
| Yes                                                                                | 111 (32)               | 6 (16)                        | 105 (34)                |         |                  |
| Missing                                                                            | 12                     | 1                             | 11                      |         |                  |
| <b>Concurrent health condition – mental health condition (anxiety, depression)</b> |                        |                               |                         | 0.69    | Chi Sq           |
| No                                                                                 | 189 (54)               | 21 (58)                       | 168 (53)                |         |                  |
| Yes                                                                                | 162 (46)               | 15 (42)                       | 147 (47)                |         |                  |
| Missing                                                                            | 8                      | 2                             | 6                       |         |                  |
| <b>Concurrent health condition – trouble sleeping (insomnia)</b>                   |                        |                               |                         | 1.00    | Chi Sq           |
| No                                                                                 | 169 (48)               | 18 (49)                       | 151 (48)                |         |                  |
| Yes                                                                                | 182 (52)               | 19 (51)                       | 163 (52)                |         |                  |
| Missing                                                                            | 8                      | 1                             | 7                       |         |                  |
| <b>Smoking history</b>                                                             |                        |                               |                         | 0.66    | Fisher Exact     |
| I currently smoke (in the last 30 days)                                            | 68 (19)                | 7 (20)                        | 61 (19)                 |         |                  |
| I smoke occasionally (in the last 30 days)                                         | 34 (10)                | 4 (11)                        | 30 (9)                  |         |                  |
| I am a former smoker (have not smoked in the last 30 days)                         | 117 (33)               | 9 (26)                        | 108 (34)                |         |                  |
| I have never been a smoker                                                         | 130 (37)               | 14 (40)                       | 116 (36)                |         |                  |
| I prefer not to answer                                                             | 5 (1)                  | 1 (3)                         | 4 (1)                   |         |                  |
| Missing                                                                            | 5                      | 3                             | 2                       |         |                  |

Additional file 2 –Participant Characteristic and EDQ Differences for Participants who Completed T2 EDQ and Did Not Complete T2 EDQ

| Characteristic                                                                                     | Full Sample<br>(n=359) | Did not Complete T2<br>(n=38) | Completed T2<br>(n=321) | p-value | Statistical Test |
|----------------------------------------------------------------------------------------------------|------------------------|-------------------------------|-------------------------|---------|------------------|
| <b>General health status</b>                                                                       |                        |                               |                         | 0.33    | Fisher Exact     |
| Excellent                                                                                          | 50 (14)                | 9 (24)                        | 41 (13)                 |         |                  |
| Very Good                                                                                          | 96 (27)                | 11 (30)                       | 85 (27)                 |         |                  |
| Good                                                                                               | 102 (29)               | 7 (19)                        | 95 (30)                 |         |                  |
| Fair                                                                                               | 77 (22)                | 7 (19)                        | 70 (22)                 |         |                  |
| Poor                                                                                               | 32 (9)                 | 3 (8)                         | 29 (9)                  |         |                  |
| Missing                                                                                            | 2                      | 1                             | 1                       |         |                  |
| <b>Health status compared to 1 year ago</b>                                                        |                        |                               |                         | 0.93    | Fisher Exact     |
| Much better now than 1 year ago                                                                    | 54 (15)                | 6 (16)                        | 48 (15)                 |         |                  |
| Somewhat better now than 1 year ago                                                                | 64 (18)                | 6 (16)                        | 58 (18)                 |         |                  |
| About the same as 1 year ago                                                                       | 135 (38)               | 13 (35)                       | 122 (38)                |         |                  |
| Somewhat worse now than 1 year ago                                                                 | 76 (21)                | 8 (22)                        | 68 (21)                 |         |                  |
| Much worse now than 1 year ago                                                                     | 28 (8)                 | 4 (11)                        | 24 (7)                  |         |                  |
| Missing                                                                                            | 2                      | 1                             | 1                       |         |                  |
| <b>Aerobic exercise (≥150 min moderate to vigorous aerobic physical activity in the past week)</b> |                        |                               |                         | 0.15    | Fisher Exact     |
| Yes                                                                                                | 143 (40)               | 16 (43)                       | 127 (40)                |         |                  |
| No                                                                                                 | 195 (55)               | 17 (46)                       | 178 (56)                |         |                  |
| I don't know                                                                                       | 18 (5)                 | 4 (11)                        | 14 (4)                  |         |                  |
| Missing                                                                                            | 3                      | 1                             | 2                       |         |                  |
| <b>Strengthening exercise (at least 2 days in the past week)</b>                                   |                        |                               |                         | 0.89    | Fisher Exact     |
| Yes                                                                                                | 103 (29)               | 12 (32)                       | 91 (28)                 |         |                  |
| No                                                                                                 | 242 (68)               | 24 (65)                       | 218 (68)                |         |                  |
| I don't know                                                                                       | 12 (3)                 | 1 (3)                         | 11 (3)                  |         |                  |
| Missing                                                                                            | 2                      | 1                             | 1                       |         |                  |
| <b>Exercise status</b>                                                                             |                        |                               |                         | 0.17    | Fisher Exact     |
| Do not exercise, do not intend to start                                                            | 42 (12)                | 3 (8)                         | 39 (12)                 |         |                  |
| Do not exercise, thinking of starting                                                              | 58 (16)                | 8 (22)                        | 50 (16)                 |         |                  |
| Exercise but not regularly                                                                         | 90 (25)                | 9 (24)                        | 81 (25)                 |         |                  |
| Exercise regularly but only begun so in last 6 months                                              | 36 (10)                | 0 (0)                         | 36 (11)                 |         |                  |
| Exercise regularly and have done so for >6 months.                                                 | 101 (28)               | 13 (35)                       | 88 (28)                 |         |                  |
| Exercised regularly in past but not doing so currently                                             | 28 (8)                 | 4 (11)                        | 24 (8)                  |         |                  |
| Missing                                                                                            | 4                      | 1                             | 3                       |         |                  |

Additional file 2 –Participant Characteristic and EDQ Differences for Participants who Completed T2 EDQ and Did Not Complete T2 EDQ

| Characteristic                                                    | Full Sample (n=359) | Did not Complete T2 (n=38) | Completed T2 (n=321) | p-value | Statistical Test |
|-------------------------------------------------------------------|---------------------|----------------------------|----------------------|---------|------------------|
| <b>Number of days exercised (30 min or more) in the past week</b> |                     |                            |                      | 0.54    | Fisher Exact     |
| 0 (None)                                                          | 97 (27)             | 11 (30)                    | 86 (27)              |         |                  |
| 1 day                                                             | 38 (11)             | 3 (8)                      | 35 (11)              |         |                  |
| 2 days                                                            | 43 (12)             | 4 (11)                     | 39 (12)              |         |                  |
| 3 days                                                            | 46 (13)             | 3 (8)                      | 43 (13)              |         |                  |
| 4 days                                                            | 41 (11)             | 3 (8)                      | 38 (12)              |         |                  |
| 5 days                                                            | 32 (9)              | 2 (5)                      | 30 (9)               |         |                  |
| 6 days                                                            | 21 (6)              | 3 (8)                      | 18 (6)               |         |                  |
| 7 days                                                            | 39 (11)             | 8 (22)                     | 31 (10)              |         |                  |
| Missing                                                           | 2                   | 1                          | 1                    |         |                  |

| Episodic Disability Questionnaire (EDQ) Scores<br>Median Scores (25 <sup>th</sup> , 75 <sup>th</sup> percentile) | Full Sample (n=359) | Did not Complete T2 (n=38) | Completed T2 (n=321) | Rank Sum Test<br>p-value |
|------------------------------------------------------------------------------------------------------------------|---------------------|----------------------------|----------------------|--------------------------|
| <b>Severity Scale</b>                                                                                            |                     |                            |                      |                          |
| Physical                                                                                                         | 34 (0, 77)          | 31 (0, 77)                 | 34 (0, 71)           | 0.24                     |
| Cognitive                                                                                                        | 20 (0, 100)         | 24 (0, 100)                | 20 (0, 100)          | 0.67                     |
| Mental-Emotional                                                                                                 | 41 (0, 100)         | 46.5 (0.0, 91.0)           | 41 (0, 100)          | 0.61                     |
| Uncertainty                                                                                                      | 39 (0, 100)         | 35 (0, 82)                 | 42 (0, 100)          | 0.16                     |
| Day-to-Day Activities                                                                                            | 21 (0, 100)         | 15 (0, 89)                 | 21 (0, 100)          | 0.17                     |
| Social                                                                                                           | 34 (0, 75)          | 35.5 (0.0, 75.0)           | 34 (0, 75)           | 0.65                     |
| <b>Presence Scale</b>                                                                                            |                     |                            |                      |                          |
| Physical                                                                                                         | 52 (0, 100)         | 45 (0, 100)                | 52 (0, 100)          | 0.053                    |
| Cognitive                                                                                                        | 67 (0, 100)         | 50 (0, 100)                | 67 (0, 100)          | 0.86                     |
| Mental-Emotional                                                                                                 | 77 (0, 100)         | 59 (0, 100)                | 77 (0, 100)          | 0.49                     |
| Uncertainty                                                                                                      | 78 (0, 100)         | 59 (0, 100)                | 78 (0, 100)          | 0.013                    |
| Day-to-Day Activities                                                                                            | 42 (0, 100)         | 23 (0, 100)                | 42 (0, 100)          | 0.091                    |
| Social                                                                                                           | 55 (0, 100)         | 49.5 (0.0, 100.0)          | 55 (0, 100)          | 0.35                     |
| <b>Episodic Scale</b>                                                                                            |                     |                            |                      |                          |
| Physical                                                                                                         | 10 (0, 100)         | 10 (0, 100)                | 10 (0, 100)          | 0.49                     |
| Cognitive                                                                                                        | 0 (0, 100)          | 0 (0, 100)                 | 0 (0, 100)           | 0.64                     |
| Mental-Emotional                                                                                                 | 0 (0, 100)          | 20 (0, 100)                | 0 (0, 100)           | 0.18                     |
| Uncertainty                                                                                                      | 0 (0, 100)          | 0 (0, 100)                 | 0 (0, 100)           | 0.45                     |
| Day-to-Day Activities                                                                                            | 0 (0, 100)          | 0 (0, 100)                 | 0 (0, 100)           | 0.29                     |
| Social                                                                                                           | 0 (0, 100)          | 0 (0, 100)                 | 0 (0, 100)           | 0.88                     |
