# Supplementary material for: Episodic disability questionnaire (EDQ) measurement properties among adults living with HIV in Canada, Ireland, United Kingdom, and United States
Source: Springer Nature journal article supplement (doi:10.1186/s12879-023-08958-7), 2024-01-10
Supplement: MOESM3 [file 26614558]

**Additional file 3 - Participant Characteristic Differences Across Sites – All Characteristics**

| Characteristic                   | Full Sample (n=359) | Brighton, UK (n=75) | London, UK (n=75) | Denver, United States (n=78) | Dublin, Ireland (n=51) | Toronto, Canada (n=80) | p-value | Statistical Test |
|----------------------------------|---------------------|---------------------|-------------------|------------------------------|------------------------|------------------------|---------|------------------|
| <b>Age</b>                       |                     |                     |                   |                              |                        |                        | <0.001  | Kruskal Wallis   |
| Mean (sd)                        | 50.6 (11.8)         | 53.8 (11.3)         | 50.9 (10.8)       | 48.9 (12.3)                  | 44.3 (11.3)            | 53.2 (11.2)            |         |                  |
| Median (Min,Max)                 | 51 (20, 82)         | 54.5 (29.0, 82.0)   | 51 (31, 79)       | 50.5 (20.0, 82.0)            | 43 (28, 71)            | 55 (25, 71)            |         |                  |
| Missing                          | 6                   | 3                   | 1                 | 0                            | 1                      | 1                      |         |                  |
| <b>Gender</b>                    |                     |                     |                   |                              |                        |                        | <0.001  | MC sim           |
| Woman: Cis-Woman                 | 40 (11)             | 1 (1)               | 4 (6)             | 19 (25)                      | 9 (18)                 | 7 (9)                  |         |                  |
| Man: Cis-Man                     | 293 (83)            | 74 (99)             | 65 (90)           | 52 (68)                      | 41 (82)                | 61 (76)                |         |                  |
| All Other*                       | 21 (6)              | 0 (0)               | 3 (4)             | 6 (8)                        | 0 (0)                  | 12 (15)                |         |                  |
| Missing                          | 5                   | 0                   | 3                 | 1                            | 1                      | 0                      |         |                  |
| <b>Sex</b>                       |                     |                     |                   |                              |                        |                        | <0.001  | MC sim           |
| Female                           | 40 (11)             | 1 (1)               | 4 (5)             | 19 (25)                      | 9 (18)                 | 7 (9)                  |         |                  |
| Male                             | 314 (88)            | 74 (99)             | 69 (95)           | 58 (75)                      | 41 (82)                | 72 (90)                |         |                  |
| Intersex                         | 1 (0)               | 0 (0)               | 0 (0)             | 0 (0)                        | 0 (0)                  | 1 (1)                  |         |                  |
| Missing                          | 4                   | 0                   | 2                 | 1                            | 1                      | 0                      |         |                  |
| <b>Relationship status</b>       |                     |                     |                   |                              |                        |                        | <0.001  | Chi Sq           |
| Single                           | 196 (58)            | 39 (57)             | 45 (62)           | 42 (55)                      | 17 (37)                | 53 (71)                |         |                  |
| Married or common law            | 88 (26)             | 15 (22)             | 17 (24)           | 24 (31)                      | 24 (52)                | 8 (11)                 |         |                  |
| Separated or divorced or widowed | 55 (16)             | 15 (22)             | 10 (14)           | 11 (14)                      | 5 (11)                 | 14 (19)                |         |                  |
| Missing                          | 20                  | 6                   | 3                 | 1                            | 5                      | 5                      |         |                  |
| <b>Have children</b>             |                     |                     |                   |                              |                        |                        | 0.008   | Chi Sq           |
| Yes                              | 86 (24)             | 13 (17)             | 10 (14)           | 28 (36)                      | 12 (24)                | 23 (29)                |         |                  |
| No                               | 269 (76)            | 62 (83)             | 64 (86)           | 49 (64)                      | 38 (76)                | 56 (71)                |         |                  |
| Missing                          | 4                   | 0                   | 1                 | 1                            | 1                      | 1                      |         |                  |
| <b>Live alone</b>                |                     |                     |                   |                              |                        |                        | <0.001  | Chi Sq           |
| Yes                              | 186 (52)            | 34 (45)             | 43 (58)           | 32 (41)                      | 13 (26)                | 64 (80)                |         |                  |
| No                               | 171 (48)            | 41 (55)             | 31 (42)           | 46 (59)                      | 37 (74)                | 16 (20)                |         |                  |
| Missing                          | 2                   | 0                   | 1                 | 0                            | 1                      | 0                      |         |                  |

Additional file 3 –Participant Characteristic Differences Across Cities

| Characteristic                                                                                                            | Full Sample (n=359) | Brighton, UK (n=75) | London, UK (n=75) | Denver, United States (n=78) | Dublin, Ireland (n=51) | Toronto, Canada (n=80) | p-value | Statistical Test |
|---------------------------------------------------------------------------------------------------------------------------|---------------------|---------------------|-------------------|------------------------------|------------------------|------------------------|---------|------------------|
| <b>Source of Income</b>                                                                                                   |                     |                     |                   |                              |                        |                        | <0.001  | MC sim           |
| Employment (Full, Part-Time, or Self)                                                                                     | 177 (50)            | 50 (67)             | 39 (53)           | 43 (55)                      | 41 (82)                | 4 (5)                  |         |                  |
| Income Support (e.g. Disability, Welfare, Worker's Compensation, Employment Insurance or Long Term Disability)            | 121 (34)            | 10 (13)             | 24 (32)           | 25 (32)                      | 7 (14)                 | 55 (69)                |         |                  |
| Pension, Student Loans, or Savings                                                                                        | 41 (11)             | 13 (17)             | 6 (8)             | 3 (4)                        | 1 (2)                  | 18 (22)                |         |                  |
| Under the table work or Street Related Work (e. g. panhandling)                                                           | 3 (1)               | 0 (0)               | 0 (0)             | 1 (1)                        | 0 (0)                  | 2 (3)                  |         |                  |
| Other                                                                                                                     | 15 (4)              | 2 (3)               | 5 (7)             | 6 (8)                        | 1 (2)                  | 1 (1)                  |         |                  |
| Missing                                                                                                                   | 2                   | 0                   | 1                 | 0                            | 1                      | 0                      |         |                  |
| <b>Employment status</b>                                                                                                  |                     |                     |                   |                              |                        |                        | <0.001  | MC sim           |
| Employed (Full time or Part time)                                                                                         | 167 (47)            | 48 (65)             | 35 (47)           | 44 (56)                      | 37 (76)                | 3 (4)                  |         |                  |
| Student, Retired or Volunteering                                                                                          | 59 (17)             | 15 (20)             | 11 (15)           | 6 (8)                        | 5 (10)                 | 22 (28)                |         |                  |
| Unemployed or On Disability                                                                                               | 124 (35)            | 11 (15)             | 26 (35)           | 26 (33)                      | 6 (12)                 | 55 (69)                |         |                  |
| Other                                                                                                                     | 5 (1)               | 0 (0)               | 2 (3)             | 2 (3)                        | 1 (2)                  | 0 (0)                  |         |                  |
| Missing                                                                                                                   | 4                   | 1                   | 1                 | 0                            | 2                      | 0                      |         |                  |
| <b>Highest level of education</b>                                                                                         |                     |                     |                   |                              |                        |                        | 0.29    | Chi Sq           |
| No formal education; secondary school completed                                                                           | 88 (25)             | 15 (20)             | 18 (24)           | 19 (24)                      | 11 (22)                | 25 (31)                |         |                  |
| Completed trade or technical training (received certification /diploma) or completed college (received degree or diploma) | 132 (37)            | 27 (36)             | 24 (32)           | 30 (38)                      | 16 (32)                | 35 (44)                |         |                  |
| Completed university (received degree) or postgraduate education                                                          | 137 (38)            | 33 (44)             | 32 (43)           | 29 (37)                      | 23 (46)                | 20 (25)                |         |                  |
| Missing                                                                                                                   | 2                   | 0                   | 1                 | 0                            | 1                      | 0                      |         |                  |
| <b>Race White</b>                                                                                                         |                     |                     |                   |                              |                        |                        | 0.076   | Chi Sq           |
| Yes                                                                                                                       | 255 (81)            | 64 (86)             | 53 (90)           | 52 (72)                      | 36 (80)                | 50 (78)                |         |                  |
| No                                                                                                                        | 59 (19)             | 10 (14)             | 6 (10)            | 20 (28)                      | 9 (20)                 | 14 (22)                |         |                  |
| Missing                                                                                                                   | 45                  | 1                   | 16                | 6                            | 6                      | 16                     |         |                  |
| <b>Year of HIV diagnosis</b>                                                                                              |                     |                     |                   |                              |                        |                        | <0.001  | Kruskal Wallis   |
| Mean (sd)                                                                                                                 | 2004 (10)           | 2005 (9)            | 2004 (10)         | 2002 (11)                    | 2013 (6)               | 2000 (10)              |         |                  |
| Median (Min,Max)                                                                                                          | 2005 (1980, 2021)   | 2007 (1985, 2021)   | 2002 (1986, 2021) | 2002 (1984, 2021)            | 2014 (1997, 2020)      | 2000 (1980, 2019)      |         |                  |
| Missing                                                                                                                   | 115                 | 24                  | 25                | 23                           | 17                     | 26                     |         |                  |

Additional file 3 –Participant Characteristic Differences Across Cities

| Characteristic                                                           | Full Sample (n=359) | Brighton, UK (n=75) | London, UK (n=75) | Denver, United States (n=78) | Dublin, Ireland (n=51) | Toronto, Canada (n=80) | p-value | Statistical Test |
|--------------------------------------------------------------------------|---------------------|---------------------|-------------------|------------------------------|------------------------|------------------------|---------|------------------|
| <b>In HIV care</b>                                                       |                     |                     |                   |                              |                        |                        | <0.001  | Fisher Exact     |
| Yes                                                                      | 339 (95)            | 68 (91)             | 72 (97)           | 78 (100)                     | 50 (100)               | 71 (89)                |         |                  |
| No                                                                       | 18 (5)              | 7 (9)               | 2 (3)             | 0 (0)                        | 0 (0)                  | 9 (11)                 |         |                  |
| Missing                                                                  | 2                   | 0                   | 1                 | 0                            | 1                      | 0                      |         |                  |
| <b>Antiretroviral use</b>                                                |                     |                     |                   |                              |                        |                        | 0.16    | Fisher Exact     |
| Yes                                                                      | 351 (98)            | 75 (100)            | 73 (99)           | 77 (99)                      | 50 (100)               | 76 (95)                |         |                  |
| No                                                                       | 6 (2)               | 0 (0)               | 1 (1)             | 1 (1)                        | 0 (0)                  | 4 (5)                  |         |                  |
| Missing                                                                  | 2                   | 0                   | 1                 | 0                            | 1                      | 0                      |         |                  |
| <b>Undetectable viral load</b>                                           |                     |                     |                   |                              |                        |                        | 0.008   | Fisher Exact     |
| Yes                                                                      | 328 (93)            | 73 (99)             | 69 (93)           | 66 (85)                      | 48 (98)                | 72 (91)                |         |                  |
| No                                                                       | 26 (7)              | 1 (1)               | 5 (7)             | 12 (15)                      | 1 (2)                  | 7 (9)                  |         |                  |
| Missing                                                                  | 5                   | 1                   | 1                 | 0                            | 2                      | 1                      |         |                  |
| <b>Concurrent health condition – addiction or substance use disorder</b> |                     |                     |                   |                              |                        |                        | <0.001  | Chi Sq           |
| No                                                                       | 276 (78)            | 63 (85)             | 63 (86)           | 63 (81)                      | 45 (90)                | 42 (54)                |         |                  |
| Yes                                                                      | 77 (22)             | 11 (15)             | 10 (14)           | 15 (19)                      | 5 (10)                 | 36 (46)                |         |                  |
| Missing                                                                  | 6                   | 1                   | 2                 | 0                            | 1                      | 2                      |         |                  |
| <b>Concurrent health condition – chronic joint pain</b>                  |                     |                     |                   |                              |                        |                        | <0.001  | MC sim           |
| No                                                                       | 233 (67)            | 59 (82)             | 48 (68)           | 48 (62)                      | 46 (92)                | 32 (42)                |         |                  |
| Yes                                                                      | 113 (33)            | 13 (18)             | 23 (32)           | 29 (38)                      | 4 (8)                  | 44 (58)                |         |                  |
| Missing                                                                  | 13                  | 3                   | 4                 | 1                            | 1                      | 4                      |         |                  |
| <b>Concurrent health condition – chronic neuropathic pain</b>            |                     |                     |                   |                              |                        |                        | <0.001  | MC sim           |
| No                                                                       | 266 (77)            | 65 (89)             | 50 (69)           | 60 (78)                      | 48 (96)                | 43 (57)                |         |                  |
| Yes                                                                      | 81 (23)             | 8 (11)              | 22 (31)           | 17 (22)                      | 2 (4)                  | 32 (43)                |         |                  |
| Missing                                                                  | 12                  | 2                   | 3                 | 1                            | 1                      | 5                      |         |                  |
| <b>Concurrent health condition – chronic soft tissue pain</b>            |                     |                     |                   |                              |                        |                        | <0.001  | Chi Sq           |
| No                                                                       | 247 (71)            | 63 (85)             | 52 (72)           | 54 (70)                      | 43 (86)                | 35 (46)                |         |                  |
| Yes                                                                      | 102 (29)            | 11 (15)             | 20 (28)           | 23 (30)                      | 7 (14)                 | 41 (54)                |         |                  |
| Missing                                                                  | 10                  | 1                   | 3                 | 1                            | 1                      | 4                      |         |                  |
| <b>Concurrent health condition – cognitive decline</b>                   |                     |                     |                   |                              |                        |                        | <0.001  | Fisher Exact     |
| No                                                                       | 254 (73)            | 62 (84)             | 49 (68)           | 52 (67)                      | 46 (92)                | 45 (59)                |         |                  |
| Yes                                                                      | 96 (27)             | 12 (16)             | 23 (32)           | 26 (33)                      | 4 (8)                  | 31 (41)                |         |                  |
| Missing                                                                  | 9                   | 1                   | 3                 | 0                            | 1                      | 4                      |         |                  |

Additional file 3 –Participant Characteristic Differences Across Cities

| Characteristic                                                                     | Full Sample (n=359) | Brighton, UK (n=75) | London, UK (n=75) | Denver, United States (n=78) | Dublin, Ireland (n=51) | Toronto, Canada (n=80) | p-value | Statistical Test |
|------------------------------------------------------------------------------------|---------------------|---------------------|-------------------|------------------------------|------------------------|------------------------|---------|------------------|
| <b>Concurrent health condition – gastrointestinal conditions</b>                   |                     |                     |                   |                              |                        |                        | 0.089   | Chi Sq           |
| No                                                                                 | 240 (69)            | 56 (76)             | 52 (72)           | 54 (70)                      | 36 (72)                | 42 (56)                |         |                  |
| Yes                                                                                | 108 (31)            | 18 (24)             | 20 (28)           | 23 (30)                      | 14 (28)                | 33 (44)                |         |                  |
| Missing                                                                            | 11                  | 1                   | 3                 | 1                            | 1                      | 5                      |         |                  |
| <b>Concurrent health condition – high blood pressure</b>                           |                     |                     |                   |                              |                        |                        | 0.006   | Chi Sq           |
| No                                                                                 | 247 (71)            | 59 (80)             | 53 (73)           | 46 (60)                      | 42 (84)                | 47 (62)                |         |                  |
| Yes                                                                                | 103 (29)            | 15 (20)             | 20 (27)           | 31 (40)                      | 8 (16)                 | 29 (38)                |         |                  |
| Missing                                                                            | 9                   | 1                   | 2                 | 1                            | 1                      | 4                      |         |                  |
| <b>Concurrent health condition – high cholesterol</b>                              |                     |                     |                   |                              |                        |                        | 0.49    | Chi Sq           |
| No                                                                                 | 236 (68)            | 53 (72)             | 53 (73)           | 51 (67)                      | 34 (69)                | 45 (60)                |         |                  |
| Yes                                                                                | 111 (32)            | 21 (28)             | 20 (27)           | 25 (33)                      | 15 (31)                | 30 (40)                |         |                  |
| Missing                                                                            | 12                  | 1                   | 2                 | 2                            | 2                      | 5                      |         |                  |
| <b>Concurrent health condition – mental health condition (anxiety, depression)</b> |                     |                     |                   |                              |                        |                        | <0.001  | Chi Sq           |
| No                                                                                 | 189 (54)            | 52 (70)             | 39 (53)           | 41 (53)                      | 33 (67)                | 24 (31)                |         |                  |
| Yes                                                                                | 162 (46)            | 22 (30)             | 34 (47)           | 36 (47)                      | 16 (33)                | 54 (69)                |         |                  |
| Missing                                                                            | 8                   | 1                   | 2                 | 1                            | 2                      | 2                      |         |                  |
| <b>Concurrent health condition – trouble sleeping (insomnia)</b>                   |                     |                     |                   |                              |                        |                        | <0.001  | Chi Sq           |
| No                                                                                 | 169 (48)            | 42 (57)             | 31 (42)           | 41 (53)                      | 32 (64)                | 23 (30)                |         |                  |
| Yes                                                                                | 182 (52)            | 32 (43)             | 42 (58)           | 37 (47)                      | 18 (36)                | 53 (70)                |         |                  |
| Missing                                                                            | 8                   | 1                   | 2                 | 0                            | 1                      | 4                      |         |                  |
| <b>Smoking history</b>                                                             |                     |                     |                   |                              |                        |                        | 0.001   | MC sim           |
| I currently smoke (in the last 30 days)                                            | 68 (19)             | 13 (18)             | 12 (16)           | 8 (10)                       | 5 (10)                 | 30 (38)                |         |                  |
| I smoke occasionally (in the last 30 days)                                         | 34 (10)             | 6 (8)               | 10 (14)           | 5 (6)                        | 8 (16)                 | 5 (6)                  |         |                  |
| I am a former smoker (have not smoked in the last 30 days)                         | 117 (33)            | 27 (36)             | 19 (26)           | 35 (45)                      | 14 (28)                | 22 (28)                |         |                  |
| I have never been a smoker                                                         | 130 (37)            | 28 (38)             | 31 (42)           | 29 (38)                      | 21 (42)                | 21 (26)                |         |                  |
| I prefer not to answer                                                             | 5 (1)               | 0 (0)               | 1 (1)             | 0 (0)                        | 2 (4)                  | 2 (3)                  |         |                  |
| Missing                                                                            | 5                   | 1                   | 2                 | 1                            | 1                      | 0                      |         |                  |

Additional file 3 –Participant Characteristic Differences Across Cities

| Characteristic                                                                                                     | Full Sample (n=359) | Brighton, UK (n=75) | London, UK (n=75) | Denver, United States (n=78) | Dublin, Ireland (n=51) | Toronto, Canada (n=80) | p-value | Statistical Test |
|--------------------------------------------------------------------------------------------------------------------|---------------------|---------------------|-------------------|------------------------------|------------------------|------------------------|---------|------------------|
| <b>General health status</b>                                                                                       |                     |                     |                   |                              |                        |                        | 0.021   | MC sim           |
| Excellent                                                                                                          | 50 (14)             | 10 (13)             | 10 (14)           | 12 (15)                      | 9 (18)                 | 9 (11)                 |         |                  |
| Very Good                                                                                                          | 96 (27)             | 23 (31)             | 17 (23)           | 23 (29)                      | 21 (42)                | 12 (15)                |         |                  |
| Good                                                                                                               | 102 (29)            | 24 (32)             | 14 (19)           | 21 (27)                      | 12 (24)                | 31 (39)                |         |                  |
| Fair                                                                                                               | 77 (22)             | 14 (19)             | 21 (28)           | 17 (22)                      | 7 (14)                 | 18 (22)                |         |                  |
| Poor                                                                                                               | 32 (9)              | 4 (5)               | 12 (16)           | 5 (6)                        | 1 (2)                  | 10 (12)                |         |                  |
| Missing                                                                                                            | 2                   | 0                   | 1                 | 0                            | 1                      | 0                      |         |                  |
| <b>Health status compared to 1 year ago</b>                                                                        |                     |                     |                   |                              |                        |                        | 0.011   | MC sim           |
| Much better now than 1 year ago                                                                                    | 54 (15)             | 7 (9)               | 10 (14)           | 18 (23)                      | 10 (20)                | 9 (11)                 |         |                  |
| Somewhat better now than 1 year ago                                                                                | 64 (18)             | 11 (15)             | 10 (14)           | 13 (17)                      | 6 (12)                 | 24 (30)                |         |                  |
| About the same as 1 year ago                                                                                       | 135 (38)            | 38 (51)             | 30 (41)           | 20 (26)                      | 23 (46)                | 24 (30)                |         |                  |
| Somewhat worse now than 1 year ago                                                                                 | 76 (21)             | 17 (23)             | 17 (23)           | 21 (27)                      | 8 (16)                 | 13 (16)                |         |                  |
| Much worse now than 1 year ago                                                                                     | 28 (8)              | 2 (3)               | 7 (9)             | 6 (8)                        | 3 (6)                  | 10 (12)                |         |                  |
| Missing                                                                                                            | 2                   | 0                   | 1                 | 0                            | 1                      | 0                      |         |                  |
| <b>Aerobic exercise (<math>\geq</math>150 min moderate to vigorous aerobic physical activity in the past week)</b> |                     |                     |                   |                              |                        |                        | 0.31    | MC sim           |
| Yes                                                                                                                | 143 (40)            | 38 (51)             | 28 (38)           | 28 (36)                      | 18 (36)                | 31 (39)                |         |                  |
| No                                                                                                                 | 195 (55)            | 33 (44)             | 45 (61)           | 46 (60)                      | 28 (56)                | 43 (54)                |         |                  |
| I don't know                                                                                                       | 18 (5)              | 4 (5)               | 1 (1)             | 3 (4)                        | 4 (8)                  | 6 (7)                  |         |                  |
| Missing                                                                                                            | 3                   | 0                   | 1                 | 1                            | 1                      | 0                      |         |                  |
| <b>Strengthening exercise (at least 2 days in the past week)</b>                                                   |                     |                     |                   |                              |                        |                        | 0.19    | MC sim           |
| Yes                                                                                                                | 103 (29)            | 23 (31)             | 22 (30)           | 23 (29)                      | 9 (18)                 | 26 (32)                |         |                  |
| No                                                                                                                 | 242 (68)            | 52 (69)             | 49 (66)           | 53 (68)                      | 40 (80)                | 48 (60)                |         |                  |
| I don't know                                                                                                       | 12 (3)              | 0 (0)               | 3 (4)             | 2 (3)                        | 1 (2)                  | 6 (7)                  |         |                  |
| Missing                                                                                                            | 2                   | 0                   | 1                 | 0                            | 1                      | 0                      |         |                  |
| <b>Exercise status</b>                                                                                             |                     |                     |                   |                              |                        |                        | 0.014   | MC sim           |
| Do not exercise, do not intend to start                                                                            | 42 (12)             | 6 (8)               | 11 (15)           | 7 (9)                        | 3 (6)                  | 15 (19)                |         |                  |
| Do not exercise, thinking of starting                                                                              | 58 (16)             | 10 (14)             | 8 (11)            | 14 (18)                      | 11 (22)                | 15 (19)                |         |                  |
| Exercise but not regularly                                                                                         | 90 (25)             | 16 (22)             | 19 (26)           | 16 (21)                      | 18 (36)                | 21 (27)                |         |                  |
| Exercise regularly but only begun so in last 6 months                                                              | 36 (10)             | 7 (9)               | 9 (12)            | 13 (17)                      | 0 (0)                  | 7 (9)                  |         |                  |
| Exercise regularly and have done so for >6 months.                                                                 | 101 (28)            | 30 (41)             | 19 (26)           | 21 (27)                      | 17 (34)                | 14 (18)                |         |                  |
| Exercised regularly in past but not doing so currently                                                             | 28 (8)              | 5 (7)               | 8 (11)            | 7 (9)                        | 1 (2)                  | 7 (9)                  |         |                  |
| Missing                                                                                                            | 4                   | 1                   | 1                 | 0                            | 1                      | 1                      |         |                  |

Additional file 3 –Participant Characteristic Differences Across Cities

| Characteristic                                                    | Full Sample<br>(n=359) | Brighton, UK<br>(n=75) | London, UK<br>(n=75) | Denver, United<br>States (n=78) | Dublin, Ireland<br>(n=51) | Toronto, Canada<br>(n=80) | p-value | Statistical<br>Test |
|-------------------------------------------------------------------|------------------------|------------------------|----------------------|---------------------------------|---------------------------|---------------------------|---------|---------------------|
| <b>Number of days exercised (30 min or more) in the past week</b> |                        |                        |                      |                                 |                           |                           | 0.85    | MC sim              |
| 0 (None)                                                          | 97 (27)                | 20 (27)                | 22 (30)              | 20 (26)                         | 10 (20)                   | 25 (31)                   |         |                     |
| 1 day                                                             | 38 (11)                | 8 (11)                 | 9 (12)               | 8 (10)                          | 3 (6)                     | 10 (12)                   |         |                     |
| 2 days                                                            | 43 (12)                | 11 (15)                | 4 (5)                | 11 (14)                         | 9 (18)                    | 8 (10)                    |         |                     |
| 3 days                                                            | 46 (13)                | 9 (12)                 | 10 (14)              | 11 (14)                         | 7 (14)                    | 9 (11)                    |         |                     |
| 4 days                                                            | 41 (11)                | 12 (16)                | 7 (9)                | 8 (10)                          | 5 (10)                    | 9 (11)                    |         |                     |
| 5 days                                                            | 32 (9)                 | 3 (4)                  | 9 (12)               | 7 (9)                           | 7 (14)                    | 6 (7)                     |         |                     |
| 6 days                                                            | 21 (6)                 | 6 (8)                  | 6 (8)                | 5 (6)                           | 2 (4)                     | 2 (3)                     |         |                     |
| 7 days                                                            | 39 (11)                | 6 (8)                  | 7 (9)                | 8 (10)                          | 7 (14)                    | 11 (14)                   |         |                     |
| Missing                                                           | 2                      | 0                      | 1                    | 0                               | 1                         | 0                         |         |                     |

Statistical tests: KW Kruskal Wallis, CS Chi Square, FE Fisher's Exact, MC, Monte Carlo Simulation;

Other\* include: Agokwa – male body/changing one's in the Ojibwa Nation, Bender Gender
