# Supplementary material for: Episodic disability questionnaire (EDQ) measurement properties among adults living with HIV in Canada, Ireland, United Kingdom, and United States
Source: Springer Nature journal article supplement (doi:10.1186/s12879-023-08958-7), 2024-01-10
Supplement: MOESM4 [file 26614558]

Additional file 4 - Episodic Disability Questionnaire (EDQ) Scores and Criterion Measure Scores by City at Time 1 (n=359)

**Additional file 4 - Episodic Disability Questionnaire (EDQ) Scores by City at Time 1 (n=359)**

| EDQ Scores                                              | Entire Sample (n=359) | Brighton, United Kingdom (n=75) | London, United Kingdom (n=75) | Denver, United States (n=78) | Dublin, Ireland (n=51) | Toronto, Canada (n=80) | Kruskal Wallis Test p-value |
|---------------------------------------------------------|-----------------------|---------------------------------|-------------------------------|------------------------------|------------------------|------------------------|-----------------------------|
| <b>Presence Domain Scores</b>                           |                       |                                 |                               |                              |                        |                        |                             |
| <b>Physical</b>                                         |                       |                                 |                               |                              |                        |                        | <0.001                      |
| Median (25 <sup>th</sup> , 75 <sup>th</sup> percentile) | 52 (37,75)            | 45 (37,59)                      | 52 (27,75)                    | 59 (37,75)                   | 45 (15,59)             | 66 (52,86)             |                             |
| Min - max                                               | 0 - 100               | 0 - 100                         | 0 - 100                       | 0 - 100                      | 0 - 86                 | 0 - 100                |                             |
| <b>Cognitive</b>                                        |                       |                                 |                               |                              |                        |                        | <0.001                      |
| Median (25 <sup>th</sup> , 75 <sup>th</sup> percentile) | 67 (33,100)           | 67 (0,100)                      | 67 (0,100)                    | 67 (25,100)                  | 33 (0,67)              | 100 (67,100)           |                             |
| Min - max                                               | 0 - 100               | 0 - 100                         | 0 - 100                       | 0 - 100                      | 0 - 100                | 0 - 100                |                             |
| <b>Mental-Emotional</b>                                 |                       |                                 |                               |                              |                        |                        | <0.001                      |
| Median (25 <sup>th</sup> , 75 <sup>th</sup> percentile) | 77 (41,100)           | 41 (22,100)                     | 77 (41,100)                   | 77 (36,100)                  | 59 (41,100)            | 100 (77,100)           |                             |
| Min - max                                               | 0 - 100               | 0 - 100                         | 0 - 100                       | 0 - 100                      | 0 - 100                | 0 - 100                |                             |
| <b>Uncertainty</b>                                      |                       |                                 |                               |                              |                        |                        | 0.003                       |
| Median (25 <sup>th</sup> , 75 <sup>th</sup> percentile) | 78 (59,100)           | 78 (41,78)                      | 59 (41,100)                   | 78 (59,100)                  | 78 (41,100)            | 78 (76,100)            |                             |
| Min - max                                               | 0 - 100               | 0 - 100                         | 0 - 100                       | 0 - 100                      | 0 - 100                | 0 - 100                |                             |
| <b>Day-to-Day Activities</b>                            |                       |                                 |                               |                              |                        |                        | <0.001                      |
| Median (25 <sup>th</sup> , 75 <sup>th</sup> percentile) | 42 (0,100)            | 23 (0,59)                       | 42 (0,100)                    | 42 (0,100)                   | 0 (0,23)               | 78 (59,100)            |                             |
| Min - max                                               | 0 - 100               | 0 - 100                         | 0 - 100                       | 0 - 100                      | 0 - 100                | 0 - 100                |                             |
| <b>Social Inclusion</b>                                 |                       |                                 |                               |                              |                        |                        | <0.001                      |
| Median (25 <sup>th</sup> , 75 <sup>th</sup> percentile) | 55 (32,67)            | 44 (18,67)                      | 55 (32,67)                    | 55 (32,82)                   | 32 (18,55)             | 67 (55,82)             |                             |
| Min - max                                               | 0 - 100               | 0 - 100                         | 0 - 100                       | 0 - 100                      | 0 - 100                | 0 - 100                |                             |
| <b>Severity Domain Scores</b>                           |                       |                                 |                               |                              |                        |                        |                             |
| <b>Physical</b>                                         |                       |                                 |                               |                              |                        |                        | <0.001                      |
| Median (25 <sup>th</sup> , 75 <sup>th</sup> percentile) | 34 (20,47)            | 24 (16,43)                      | 31 (16,50)                    | 34 (16,48)                   | 28 (6,39)              | 45 (31,52)             |                             |
| Min - max                                               | 0 - 77                | 0 - 53                          | 0 - 77                        | 0 - 60                       | 0 - 51                 | 0 - 71                 |                             |
| <b>Cognitive</b>                                        |                       |                                 |                               |                              |                        |                        | <0.001                      |
| Median (25 <sup>th</sup> , 75 <sup>th</sup> percentile) | 20 (11, 42)           | 20 (0,28)                       | 20 (0,48)                     | 24 (8,42)                    | 11 (0,28)              | 35 (20,48)             |                             |
| Min - max                                               | 0 - 100               | 0 - 68                          | 0 - 100                       | 0 - 77                       | 0 - 61                 | 0 - 100                |                             |
| <b>Mental-Emotional</b>                                 |                       |                                 |                               |                              |                        |                        | <0.001                      |
| Median (25 <sup>th</sup> , 75 <sup>th</sup> percentile) | 41 (18,53)            | 26 (10,45)                      | 45 (18,56)                    | 37 (18,53)                   | 32 (18,53)             | 51 (37,63)             |                             |
| Min - max                                               | 0 - 100               | 0 - 78                          | 0 - 100                       | 0 - 84                       | 0 - 84                 | 0 - 100                |                             |
| <b>Uncertainty</b>                                      |                       |                                 |                               |                              |                        |                        | <0.001                      |
| Median (25 <sup>th</sup> , 75 <sup>th</sup> percentile) | 39 (30,52)            | 35 (17,42)                      | 35 (24,55)                    | 42 (30,55)                   | 39 (30,47)             | 47 (39,57)             |                             |
| Min - max                                               | 0 - 100               | 0 - 75                          | 0 - 100                       | 0 - 90                       | 0 - 100                | 0 - 100                |                             |
| <b>Day-to-Day Activities</b>                            |                       |                                 |                               |                              |                        |                        | <0.001                      |
| Median (25 <sup>th</sup> , 75 <sup>th</sup> percentile) | 21 (0,36)             | 8 (0,26)                        | 21 (0,42)                     | 21 (0,38)                    | 0 (0,8)                | 36 (21,44)             |                             |
| Min - max                                               | 0 - 100               | 0 - 89                          | 0 - 64                        | 0 - 100                      | 0 - 50                 | 0 - 89                 |                             |
| <b>Social Inclusion</b>                                 |                       |                                 |                               |                              |                        |                        | <0.001                      |
| Median (25 <sup>th</sup> , 75 <sup>th</sup> percentile) | 34 (15,46)            | 21 (8,39)                       | 34 (15,44)                    | 37 (15,46)                   | 21 (8,37)              | 44 (32, 51)            |                             |
| Min - max                                               | 0 - 75                | 0 - 75                          | 0 - 69                        | 0 - 69                       | 0 - 75                 | 0 - 69                 |                             |

Additional file 4 - Episodic Disability Questionnaire (EDQ) Scores and Criterion Measure Scores by City at Time 1 (n=359)

| EDQ Scores                                                   | Entire Sample (n=359) | Brighton, United Kingdom (n=75) | London, United Kingdom (n=75) | Denver, United States (n=78) | Dublin, Ireland (n=51) | Toronto, Canada (n=80) | p-value |
|--------------------------------------------------------------|-----------------------|---------------------------------|-------------------------------|------------------------------|------------------------|------------------------|---------|
| <b>Episodic (fluctuating in the past week) Domain Scores</b> |                       |                                 |                               |                              |                        |                        |         |
| <b>Physical</b>                                              |                       |                                 |                               |                              |                        |                        | <0.001  |
| Median (25 <sup>th</sup> , 75 <sup>th</sup> percentile)      | 10 (0,40)             | 10 (0,40)                       | 20 (10,50)                    | 10 (0,40)                    | 0 (0,20)               | 20 (0,50)              |         |
| Min – max                                                    | 0 – 100               | 0 – 90                          | 0 – 100                       | 0 – 100                      | 0 – 80                 | 0 – 100                |         |
| <b>Cognitive</b>                                             |                       |                                 |                               |                              |                        |                        | <0.001  |
| Median (25 <sup>th</sup> , 75 <sup>th</sup> percentile)      | 0 (0,33)              | 0 (0,0)                         | 0 (0,67)                      | 0 (0,33)                     | 0 (0,0)                | 0 (0,67)               |         |
| Min – max                                                    | 0 – 100               | 0 – 100                         | 0 – 100                       | 0 – 100                      | 0 – 100                | 0 – 100                |         |
| <b>Mental-Emotional</b>                                      |                       |                                 |                               |                              |                        |                        | 0.004   |
| Median (25 <sup>th</sup> , 75 <sup>th</sup> percentile)      | 0 (0,40)              | 0 (0,20)                        | 20 (0,60)                     | 0 (0,40)                     | 0 (0,20)               | 20 (0,75)              |         |
| Min – max                                                    | 0 – 100               | 0 – 100                         | 0 – 100                       | 0 – 100                      | 0 – 100                | 0 – 100                |         |
| <b>Uncertainty</b>                                           |                       |                                 |                               |                              |                        |                        | 0.008   |
| Median (25 <sup>th</sup> , 75 <sup>th</sup> percentile)      | 0 (0,20)              | 0 (0,0)                         | 0 (0,20)                      | 0 (0,20)                     | 0 (0,0)                | 0 (0,60)               |         |
| Min – max                                                    | 0 – 100               | 0 – 100                         | 0 – 100                       | 0 – 100                      | 0 – 100                | 0 – 100                |         |
| <b>Day-to-Day Activities</b>                                 |                       |                                 |                               |                              |                        |                        | <0.001  |
| Median (25 <sup>th</sup> , 75 <sup>th</sup> percentile)      | 0 (0,20)              | 0 (0,0)                         | 0 (0,20)                      | 0 (0,20)                     | 0 (0,0)                | 0 (0,55)               |         |
| Min – max                                                    | 0 – 100               | 0 – 100                         | 0 – 100                       | 0 – 100                      | 0 – 40                 | 0 – 100                |         |
| <b>Social Inclusion</b>                                      |                       |                                 |                               |                              |                        |                        | <0.001  |
| Median (25 <sup>th</sup> , 75 <sup>th</sup> percentile)      | 0 (0,14)              | 0 (0,0)                         | 0 (0,0)                       | 0 (0,14)                     | 0 (0,0)                | 0 (0,43)               |         |
| Min - max                                                    | 0 – 100               | 0 – 100                         | 0 – 100                       | 0 – 100                      | 0 – 100                | 0 – 100                |         |

Additional file 4B –Criterion Measure Scores by City at Time 1 (n=359)

| Criterion Measure Scores                                                                                                    | Entire Sample (n=359) | Brighton, United Kingdom (n=75) | London, United Kingdom (n=75) | Denver, United States (n=78) | Dublin, Ireland (n=51) | Toronto, Canada (n=80) | Kruskal Wallis Test p-value |
|-----------------------------------------------------------------------------------------------------------------------------|-----------------------|---------------------------------|-------------------------------|------------------------------|------------------------|------------------------|-----------------------------|
| <b>World Health Organization Disability Assessment Schedule (WHODAS 2.0) 36-item (score range: 0-100) (n=358)</b>           |                       |                                 |                               |                              |                        |                        |                             |
| Median (25 <sup>th</sup> ,75 <sup>th</sup> percentile)                                                                      | 23.6 (6.8, 42.5)      | 15.1 (3.8, 31.6)                | 26.1 (7.8, 49.2)              | 21.2 (7.6, 41.0)             | 9.4 (3.8, 20.8)        | 39.1 (29.2, 50.9)      | <0.001                      |
| <b>Patient Health Questionnaire (PHQ) 8-item (score range: 0-24) (n=358)</b>                                                |                       |                                 |                               |                              |                        |                        |                             |
| Median (25 <sup>th</sup> ,75 <sup>th</sup> percentile)                                                                      | 6 (2, 13)             | 5.0 (1.0, 8.5)                  | 7.0 (3.0, 13.8)               | 5.5 (2.0, 11.0)              | 3.0 (1.0, 6.5)         | 10.5 (5.0, 18.0)       | <0.001                      |
| <b>Social Support Survey Questionnaire (score range: 0-100) (n=357)</b>                                                     |                       |                                 |                               |                              |                        |                        |                             |
| Median (25 <sup>th</sup> ,75 <sup>th</sup> percentile)                                                                      | 50.0 (27.6, 81.6)     | 64.5 (33.6, 89.5)               | 46.1 (30.6, 82.6)             | 59.2 (37.5, 81.2)            | 52.0 (34.2, 87.5)      | 32.2 (16.8, 60.9)      | <0.001                      |
| <b>General Health Status Self Reported – Recorded as an Ordinal Variable ranging from 1 (Poor) to 5 (Excellent) (n=357)</b> |                       |                                 |                               |                              |                        |                        |                             |
| Median (25 <sup>th</sup> ,75 <sup>th</sup> percentile)                                                                      | 3 (2, 4)              | 3 (2, 3)                        | 3 (2, 4)                      | 3 (2, 4)                     | 2 (2, 3)               | 3 (2, 4)               | 0.003                       |
