# Supplementary material for: Episodic disability questionnaire (EDQ) measurement properties among adults living with HIV in Canada, Ireland, United Kingdom, and United States
Source: Springer Nature journal article supplement (doi:10.1186/s12879-023-08958-7), 2024-01-10
Supplement: MOESM5 [file 26614558]

Additional file 5 – Characteristics of Participants based on Mode of Administration at Time 1  
(n=233 participants with similar modes of administration at T1 and T2)

**Additional file 5 – Characteristics of Participants based on Mode of Administration at Time 1  
(n=233 participants with similar modes of administration at T1 and T2)**

| Characteristic                                                                                                            | Full Sample<br>(n=233) | Remote<br>Independent<br>(SMS or email)<br>(n=209) | In person<br>(n=24) | p-value<br>(Statistical Test) |
|---------------------------------------------------------------------------------------------------------------------------|------------------------|----------------------------------------------------|---------------------|-------------------------------|
| <b>Age</b> (n=230)<br>Median (Min, Max)                                                                                   | 51 (20, 82)            | 51 (20, 82)                                        | 53 (33, 67)         | 0.44<br>(WRS)                 |
| <b>Gender</b> (n=232)                                                                                                     | # (%)                  | # (%)                                              | # (%)               |                               |
| Woman: Cis-Woman                                                                                                          | 26 (11%)               | 23 (11%)                                           | 3 (12%)             | <0.001*<br>(FE)               |
| Man: Cis-Man                                                                                                              | 195 (84%)              | 180 (87%)                                          | 15 (62%)            |                               |
| Trans Woman: Man to woman                                                                                                 | 2 (1%)                 | 0 (0%)                                             | 2 (8%)              |                               |
| Two-spirited                                                                                                              | 5 (2%)                 | 2 (1%)                                             | 3 (12%)             |                               |
| Non-binary                                                                                                                | 4 (2%)                 | 3 (1%)                                             | 1 (4%)              |                               |
| Missing                                                                                                                   | 1                      | 1                                                  | 0                   |                               |
| <b>Relationship Status</b> (n=225)                                                                                        | # (%)                  | # (%)                                              | # (%)               |                               |
| Single                                                                                                                    | 128 (57%)              | 110 (55%)                                          | 18 (75%)            | 0.06<br>(FE)                  |
| Married or common law                                                                                                     | 62 (28%)               | 60 (30%)                                           | 2 (8%)              |                               |
| Separated, divorced, or widowed                                                                                           | 35 (16%)               | 31 (15%)                                           | 4 (17%)             |                               |
| Missing                                                                                                                   | 8                      | 8                                                  | 0                   |                               |
| <b>Have children</b> (n=231)                                                                                              | # (%)                  | # (%)                                              | # (%)               |                               |
| Yes                                                                                                                       | 53 (23%)               | 47 (23%)                                           | 6 (26%)             | 0.79<br>(FE)                  |
| No                                                                                                                        | 178 (77%)              | 161 (77%)                                          | 17 (74%)            |                               |
| Missing                                                                                                                   | 2                      | 1                                                  | 1                   |                               |
| <b>Lives Alone</b> (n=233)                                                                                                | # (%)                  | # (%)                                              | # (%)               |                               |
| Yes                                                                                                                       | 121 (52%)              | 104 (50%)                                          | 17 (71%)            | 0.08<br>(CS)                  |
| No                                                                                                                        | 112 (48%)              | 105 (50%)                                          | 7 (29%)             |                               |
| <b>Source of Income</b> (n=233)                                                                                           | # (%)                  | # (%)                                              | # (%)               |                               |
| Employment (full-time, part-time, or self)                                                                                | 126 (54%)              | 126 (60%)                                          | 0 (0%)              | <0.001*<br>(FE)               |
| Income Support (e.g. Disability, Welfare, Worker's Compensation, Employment Insurance or Long Term Disability)            | 73 (31%)               | 52 (25%)                                           | 21 (88%)            |                               |
| Pension, Student Loans, or Savings                                                                                        | 25 (11%)               | 22 (11%)                                           | 3 (12%)             |                               |
| Under the table work or Street Related Work (e.g. panhandling)                                                            | 1 (0%)                 | 1 (0%)                                             | 0 (0%)              |                               |
| Other                                                                                                                     | 8 (3%)                 | 8 (4%)                                             | 0 (0%)              |                               |
| Missing                                                                                                                   | 0                      | 0                                                  | 0                   |                               |
| <b>Employment Status</b> (n=233)                                                                                          | # (%)                  | # (%)                                              | # (%)               |                               |
| Employment (full-time or part-time)                                                                                       | 123 (53%)              | 123 (59%)                                          | 0 (0%)              | <0.001*<br>(FE)               |
| Student, Retired or Volunteering                                                                                          | 36 (15%)               | 32 (15%)                                           | 4 (17%)             |                               |
| Unemployed or On Disability                                                                                               | 71 (30%)               | 51 (24%)                                           | 20 (83%)            |                               |
| Other                                                                                                                     | 3 (1%)                 | 3 (1%)                                             | 0 (0%)              |                               |
| <b>Highest Level of Education</b> (n=233)                                                                                 | # (%)                  | # (%)                                              | # (%)               |                               |
| No formal education; secondary school completed                                                                           | 56 (24%)               | 47 (22%)                                           | 9 (38%)             | 0.01*<br>(FE)                 |
| Completed trade or technical training (received certification /diploma) or completed college (received degree or diploma) | 88 (38%)               | 76 (36%)                                           | 12 (50%)            |                               |
| Completed university (received degree) or postgraduate education                                                          | 89 (38%)               | 86 (41%)                                           | 3 (12%)             |                               |

Additional file 5 – Characteristics of Participants based on Mode of Administration at Time 1  
(n=233 participants with similar modes of administration at T1 and T2)

| Characteristic                                                                                                                                                                              | Full Sample<br>(n=233) | Remote<br>Independent<br>(SMS or email)<br>(n=209) | In person<br>(n=24)  | p-value<br>(Statistical Test) |
|---------------------------------------------------------------------------------------------------------------------------------------------------------------------------------------------|------------------------|----------------------------------------------------|----------------------|-------------------------------|
| <b>Race</b>                                                                                                                                                                                 | # (%)                  | # (%)                                              | # (%)                |                               |
| White (n=222)                                                                                                                                                                               | 174 (82%)              | 160 (82%)                                          | 14 (82%)             | 1.0 (FE)                      |
| Black or African American (n=183)                                                                                                                                                           | 13 (7%)                | 10 (6)                                             | 3 (25%)              | 0.04* (FE)                    |
| Asian (n=180) (origins in far east, south east Asia, or Indian subcontinent including e.g. Cambodia, China, India, Japan, Korea, Malaysia, Pakistan, Philippine Islands, Thailand, Vietnam) | 14 (8%)                | 12 (7%)                                            | 2 (18%)              | 0.21 (FE)                     |
| First Nation (Indigenous), Inuit, Metis (n=179)                                                                                                                                             | 18 (10%)               | 17 (10%)                                           | 1 (10%)              | 1.0 (FE)                      |
| <b>Year of HIV Diagnosis</b> (n=161)<br>Median (Min, Max)                                                                                                                                   | 2006<br>(1980, 2021)   | 2007<br>(1980, 2021)                               | 2001<br>(1983, 2019) | 0.33<br>(WRS)                 |
| <b>Most Recent CD4 Count</b> (n=231)                                                                                                                                                        | # (%)                  | # (%)                                              | # (%)                |                               |
| ≤200 cells/mm <sup>3</sup>                                                                                                                                                                  | 27 (12%)               | 24 (12%)                                           | 3 (12%)              | 0.07<br>(FE)                  |
| 201-499 cells/mm <sup>3</sup>                                                                                                                                                               | 42 (18%)               | 36 (17%)                                           | 6 (25%)              |                               |
| ≥ 500 cells/mm <sup>3</sup>                                                                                                                                                                 | 91 (39%)               | 87 (42%)                                           | 4 (17%)              |                               |
| Don't know                                                                                                                                                                                  | 71 (31%)               | 60 (29%)                                           | 11 (46%)             |                               |
| <b>Currently taking Antiretroviral Medications</b><br>(n=233)                                                                                                                               | 229 (98%)              | 208 (100%)                                         | 21 (88%)             | 0.004*<br>(FE)                |
| <b>Missed at least one dose of Antiretroviral Medication in the last 7 days</b> (n=228)                                                                                                     | 40 (18%)               | 34 (16%)                                           | 6 (29%)              | 0.22<br>(FE)                  |
| <b>Undetectable Viral Load (&lt;50 copies/ml)</b><br>(n=232)                                                                                                                                | 212 (91%)              | 194 (93%)                                          | 18 (75%)             | 0.009*<br>(FE)                |

\*indicates statistical significance p<0.05;

Statistical tests: KW Kruskal Wallis, CS Chi Square, FE Fisher's Exact; WRS Wilcoxon Rank Sum
