# Supplementary material for: Episodic disability questionnaire (EDQ) measurement properties among adults living with HIV in Canada, Ireland, United Kingdom, and United States
Source: Springer Nature journal article supplement (doi:10.1186/s12879-023-08958-7), 2024-01-10
Supplement: MOESM6 [file 26614558]

**Additional file 6 – Mode of Administration - Test-Retest Reliability of the Episodic Disability Questionnaire (EDQ) Severity and Presence Scales**

| <b>Remote Independent Administration (SMS or email) (n=209 participants)</b> |                       |               |                       |               |
|------------------------------------------------------------------------------|-----------------------|---------------|-----------------------|---------------|
|                                                                              | <b>Severity Scale</b> |               | <b>Presence Scale</b> |               |
| <b>Domain</b>                                                                | <b>ICC</b>            | <b>95% CI</b> | <b>ICC</b>            | <b>95% CI</b> |
| Physical                                                                     | 0.79                  | 0.72,0.84     | 0.78                  | 0.71,0.82     |
| Cognitive                                                                    | 0.88                  | 0.85,0.90     | 0.80                  | 0.75,0.84     |
| Mental Emotional                                                             | 0.84                  | 0.80,0.88     | 0.79                  | 0.74,0.83     |
| Uncertainty                                                                  | 0.79                  | 0.68,0.86     | 0.72                  | 0.64,0.78     |
| Daily                                                                        | 0.89                  | 0.86,0.91     | 0.85                  | 0.81,0.88     |
| Social                                                                       | 0.83                  | 0.79,0.87     | 0.78                  | 0.73,0.82     |
| <b>In-Person Administration (tablet) (n=24 participants)</b>                 |                       |               |                       |               |
|                                                                              | <b>Severity Scale</b> |               | <b>Presence Scale</b> |               |
| <b>Domain</b>                                                                | <b>ICC</b>            | <b>95% CI</b> | <b>ICC</b>            | <b>95% CI</b> |
| Physical                                                                     | 0.74                  | 0.50,0.87     | 0.68                  | 0.45,0.83     |
| Cognitive                                                                    | 0.73                  | 0.52,0.86     | 0.56                  | 0.29,0.76     |
| Mental Emotional                                                             | 0.76                  | 0.57,0.87     | 0.65                  | 0.41,0.81     |
| Uncertainty                                                                  | 0.82                  | 0.66,0.91     | 0.48                  | 0.17,0.70     |
| Daily                                                                        | 0.81                  | 0.66,0.90     | 0.72                  | 0.50,0.85     |
| Social                                                                       | 0.87                  | 0.76,0.93     | 0.82                  | 0.67,0.91     |

ICC: Intraclass Correlation Coefficient; CI: Confidence Interval.

n=233 with similar modes of administration at T1 and T2

ICCs for the Episodic Scale not reported here; all were <0.7 (not shown). We did not expect test-retest reliability in episodic scale given asking about fluctuating in the past week.
