# Supplementary material for: Episodic disability questionnaire (EDQ) measurement properties among adults living with HIV in Canada, Ireland, United Kingdom, and United States
Source: Springer Nature journal article supplement (doi:10.1186/s12879-023-08958-7), 2024-01-10
Supplement: MOESM7 [file 26614558]

## Additional file 7: Construct Validity Hypotheses Testing and Results of the Episodic Disability Questionnaire (EDQ)

Testing validity hypothesis at Time 1 only for EDQ presence and severity scores (Rasch logit scale). We interpreted lower and upper bound confidence intervals in combination with the correlation coefficient when interpreting hypotheses.

\*Indicate primary hypotheses; LB (lower bound of confidence interval); UB (upper bound of confidence interval); All p-values have had a Holm's correction applied to control for multiple comparisons.

### Primary Hypotheses (n=36)

#### Hypothesis 1-4\*

Total WHODAS scores (WDAS\_SS) will **moderately correlate ( $\geq 0.50$ )** with EDQ SEVERITY domain scores: COGNITION, MENTAL-EMOTIONAL, DIFFICULTIES WITH DAY-TO-DAY ACTIVITIES (DAILY) and SOCIAL

| EDQ Domain                | N   | Spearman Correlation | LB   | UB   | p-value | Hypothesis confirmed? Yes /No |
|---------------------------|-----|----------------------|------|------|---------|-------------------------------|
| Severity Cognitive        | 358 | 0.74                 | 0.69 | 0.79 | <0.001  | Yes                           |
| Severity Mental Emotional | 358 | 0.73                 | 0.68 | 0.78 | <0.001  | Yes                           |
| Severity Daily            | 358 | 0.81                 | 0.77 | 0.84 | <0.001  | No                            |
| Severity Social           | 358 | 0.86                 | 0.83 | 0.88 | <0.001  | No                            |

#### Hypothesis 5-6\*

Total WHODAS scores (WDAS\_SS) will **moderately correlate ( $\geq 0.50$ )** with EDQ SEVERITY domain scores: PHYSICAL and UNCERTAINTY

| EDQ Domain           | N   | Spearman Correlation | LB   | UB   | p-value | Hypothesis confirmed? Yes /No |
|----------------------|-----|----------------------|------|------|---------|-------------------------------|
| Severity Physical    | 358 | 0.77                 | 0.73 | 0.81 | <0.001  | No                            |
| Severity Uncertainty | 358 | 0.69                 | 0.63 | 0.74 | <0.001  | Yes                           |

#### Hypothesis 7-8\*

Cognition WHODAS summary scores (WDASDo1) will **strongly correlate ( $\geq 0.70$ )** with the COGNITIVE domain scores of the EDQ (presence and severity)

| EDQ Domain         | N   | Spearman Correlation | LB   | UB   | p-value | Hypothesis confirmed? Yes /No |
|--------------------|-----|----------------------|------|------|---------|-------------------------------|
| Severity Cognitive | 359 | 0.84                 | 0.81 | 0.87 | <0.001  | Yes                           |
| Presence Cognitive | 359 | 0.79                 | 0.74 | 0.82 | <0.001  | Yes                           |

#### Hypothesis 9-10\*

Cognition WHODAS summary scores (WDASDo1) will **moderately correlate ( $\geq 0.50$ )** with the MENTAL-EMOTIONAL domain scores of the EDQ (presence and severity)

| EDQ Domain                | N   | Spearman Correlation | LB   | UB   | p-value | Hypothesis confirmed? Yes /No |
|---------------------------|-----|----------------------|------|------|---------|-------------------------------|
| Severity Mental-Emotional | 359 | 0.69                 | 0.63 | 0.74 | <0.001  | Yes                           |
| Presence Mental-Emotional | 359 | 0.6                  | 0.52 | 0.66 | <0.001  | Yes                           |

**Hypothesis 11-12\***

Mobility WHODAS summary scores will **strongly correlate ( $\geq 0.70$ )** with the DIFFICULTIES WITH DAY-TO-DAY ACTIVITIES (Daily) domain scores of the EDQ (presence and severity).

| EDQ Domain     | N   | Spearman Correlation | LB   | UB   | p-value | Hypothesis confirmed? Yes /No |
|----------------|-----|----------------------|------|------|---------|-------------------------------|
| Severity Daily | 359 | 0.85                 | 0.82 | 0.88 | <0.001  | Yes                           |
| Presence Daily | 359 | 0.84                 | 0.8  | 0.87 | <0.001  | Yes                           |

**Hypothesis 13-14\***

Self-Care WHODAS summary scores will **strongly correlate ( $\geq 0.70$ )** with the DIFFICULTIES WITH DAY-TO-DAY ACTIVITIES domain scores of the EDQ.

| EDQ Domain     | N   | Spearman Correlation | LB   | UB   | p-value | Hypothesis confirmed? Yes /No |
|----------------|-----|----------------------|------|------|---------|-------------------------------|
| Severity Daily | 359 | 0.7                  | 0.65 | 0.75 | <0.001  | No                            |
| Presence Daily | 359 | 0.69                 | 0.63 | 0.74 | <0.001  | No                            |

**Hypothesis 15-16\***

Getting Along WHODAS summary scores will **moderately correlate ( $\geq 0.50$ )** with the SOCIAL inclusion domain scores of the EDQ.

| EDQ Domain      | N   | Spearman Correlation | LB   | UB   | p-value | Hypothesis confirmed? Yes /No |
|-----------------|-----|----------------------|------|------|---------|-------------------------------|
| Severity Social | 359 | 0.79                 | 0.75 | 0.83 | <0.001  | No                            |
| Presence Social | 359 | 0.73                 | 0.68 | 0.78 | <0.001  | Yes                           |

**Hypothesis 7-18\***

Life-Activities (Household) WHODAS summary scores will **strongly correlate ( $\geq 0.70$ )** with the DIFFICULTIES WITH DAY-TO-DAY ACTIVITIES (Daily) domain scores of the EDQ.

| EDQ Domain     | N   | Spearman Correlation | LB   | UB   | p-value | Hypothesis confirmed? Yes /No |
|----------------|-----|----------------------|------|------|---------|-------------------------------|
| Severity Daily | 359 | 0.75                 | 0.7  | 0.79 | <0.001  | Yes                           |
| Presence Daily | 359 | 0.74                 | 0.69 | 0.79 | <0.001  | No                            |

**Hypothesis 19-20\***

Life-Activities (Work) WHODAS summary scores will **moderately correlate ( $\geq 0.50$ )** with the SOCIAL inclusion domain scores on the EDQ.

| EDQ Domain      | N   | Spearman Correlation | LB   | UB   | p-value | Hypothesis confirmed? Yes /No |
|-----------------|-----|----------------------|------|------|---------|-------------------------------|
| Severity Social | 156 | 0.64                 | 0.53 | 0.72 | <0.001  | Yes                           |
| Presence Social | 156 | 0.68                 | 0.59 | 0.76 | <0.001  | Yes                           |

**Hypothesis 21-22\***

Participation WHODAS summary scores will **strongly correlate ( $\geq 0.70$ )** with the SOCIAL inclusion domain scores on the EDQ.

| EDQ Domain      | N   | Spearman Correlation | LB   | UB   | p-value | Hypothesis confirmed? Yes /No |
|-----------------|-----|----------------------|------|------|---------|-------------------------------|
| Severity Social | 358 | 0.83                 | 0.79 | 0.86 | <0.001  | Yes                           |
| Presence Social | 358 | 0.8                  | 0.76 | 0.83 | <0.001  | Yes                           |

**Hypothesis 23-24\***

Participation WHODAS summary scores will **moderately correlate ( $\geq 0.50$ )** with the MENTAL-EMOTIONAL domain scores on the EDQ.

| EDQ Domain                | N   | Spearman Correlation | LB   | UB   | p-value | Hypothesis confirmed? Yes /No |
|---------------------------|-----|----------------------|------|------|---------|-------------------------------|
| Severity Mental Emotional | 358 | 0.68                 | 0.63 | 0.74 | <0.001  | Yes                           |
| Presence Mental Emotional | 358 | 0.59                 | 0.52 | 0.65 | <0.001  | Yes                           |

**Hypothesis 25-36\* (Known Groups)**

*Participants who completed the EDQ on a ‘good day’ will have significantly lower EDQ domain scores (severity and presence) on the EDQ compared to those who completed the EDQ on a ‘bad day’*

| Covariate                        | Full Sample<br>(n=359) | Bad day<br>(n=65) | Good day<br>(n=294) | p-value          | Hypothesis confirmed?<br>Yes /No |
|----------------------------------|------------------------|-------------------|---------------------|------------------|----------------------------------|
| <b>Severity Physical</b>         |                        |                   |                     | <b>&lt;0.001</b> | Yes                              |
| Mean (sd)                        | 32.1 (17.6)            | 45.4 (13.2)       | 29.1 (17.0)         |                  |                                  |
| Median (Min,Max)                 | 34 (0,77)              | 48 (0,71)         | 28 (0,77)           |                  |                                  |
| <b>Presence Physical</b>         |                        |                   |                     | <b>&lt;0.001</b> | Yes                              |
| Mean (sd)                        | 53.2 (27.5)            | 72.2 (22.1)       | 48.9 (26.8)         |                  |                                  |
| Median (Min,Max)                 | 52 (0,100)             | 75 (0,100)        | 52 (0,100)          |                  |                                  |
| <b>Severity Cognitive</b>        |                        |                   |                     | <b>&lt;0.001</b> | Yes                              |
| Mean (sd)                        | 25.9 (22.0)            | 42.4 (23.4)       | 22.2 (19.9)         |                  |                                  |
| Median (Min,Max)                 | 20 (0,100)             | 42 (0,100)        | 20 (0,100)          |                  |                                  |
| <b>Presence Cognitive</b>        |                        |                   |                     | <b>&lt;0.001</b> | Yes                              |
| Mean (sd)                        | 58.9 (40.8)            | 82.6 (31.3)       | 53.7 (40.9)         |                  |                                  |
| Median (Min,Max)                 | 67 (0,100)             | 100 (0,100)       | 67 (0,100)          |                  |                                  |
| <b>Severity Mental Emotional</b> |                        |                   |                     | <b>&lt;0.001</b> | Yes                              |
| Mean (sd)                        | 37.9 (23.5)            | 59.0 (22.0)       | 33.3 (21.2)         |                  |                                  |
| Median (Min,Max)                 | 41 (0,100)             | 58 (0,100)        | 37 (0,100)          |                  |                                  |
| <b>Presence Mental Emotional</b> |                        |                   |                     | <b>&lt;0.001</b> | Yes                              |
| Mean (sd)                        | 66.1 (35.9)            | 88.9 (22.7)       | 61.1 (36.4)         |                  |                                  |
| Median (Min,Max)                 | 77 (0,100)             | 100 (0,100)       | 59 (0,100)          |                  |                                  |
| <b>Severity Uncertainty</b>      |                        |                   |                     | <b>&lt;0.001</b> | Yes                              |
| Mean (sd)                        | 40.1 (20.9)            | 55.9 (20.4)       | 36.5 (19.4)         |                  |                                  |
| Median (Min,Max)                 | 39 (0,100)             | 55 (9,100)        | 35 (0,100)          |                  |                                  |
| <b>Presence Uncertainty</b>      |                        |                   |                     | <b>&lt;0.001</b> | Yes                              |
| Mean (sd)                        | 71.4 (30.3)            | 85.5 (22.9)       | 68.2 (30.8)         |                  |                                  |
| Median (Min,Max)                 | 78 (0,100)             | 100 (22,100)      | 78 (0,100)          |                  |                                  |
| <b>Severity Daily</b>            |                        |                   |                     | <b>&lt;0.001</b> | Yes                              |
| Mean (sd)                        | 21.2 (20.4)            | 33.8 (19.3)       | 18.4 (19.6)         |                  |                                  |
| Median (Min,Max)                 | 21 (0,100)             | 33 (0,100)        | 8 (0,89)            |                  |                                  |
| <b>Presence Daily</b>            |                        |                   |                     | <b>&lt;0.001</b> | Yes                              |
| Mean (sd)                        | 46.1 (40.6)            | 69.1 (31.8)       | 41.0 (40.6)         |                  |                                  |
| Median (Min,Max)                 | 42 (0,100)             | 78 (0,100)        | 23 (0,100)          |                  |                                  |
| <b>Severity Social</b>           |                        |                   |                     | <b>&lt;0.001</b> | Yes                              |
| Mean (sd)                        | 31.0 (18.4)            | 46.2 (13.0)       | 27.6 (17.8)         |                  |                                  |
| Median (Min,Max)                 | 34 (0,75)              | 46 (8,75)         | 27 (0,69)           |                  |                                  |
| <b>Presence Social</b>           |                        |                   |                     | <b>&lt;0.001</b> | Yes                              |
| Mean (sd)                        | 51.3 (29.9)            | 72.6 (21.7)       | 46.6 (29.4)         |                  |                                  |
| Median (Min,Max)                 | 55 (0,100)             | 67 (18,100)       | 44 (0,100)          |                  |                                  |

**Secondary (Exploratory) Hypotheses (n=44)**

**Hypothesis 37-38**

PHQ-8 scores will **strongly correlate ( $\geq 0.7$ )** with the MENTAL-EMOTIONAL symptoms and impairments domain scores of the EDQ (severity and presence scores)

| EDQ Domain                | N   | Spearman Correlation | LB   | UB   | p-value | Hypothesis confirmed? Yes /No |
|---------------------------|-----|----------------------|------|------|---------|-------------------------------|
| Severity Mental Emotional | 358 | 0.81                 | 0.77 | 0.84 | <0.001  | Yes                           |
| Presence Mental Emotional | 358 | 0.7                  | 0.64 | 0.75 | <0.001  | No                            |

**Hypothesis 39-40**

PHQ-8 scores will **moderately correlate ( $\geq 0.5$ )** with the UNCERTAINTY domain scores of the EDQ (severity and presence scores)

| EDQ Domain           | N   | Spearman Correlation | LB   | UB   | p-value | Hypothesis confirmed? Yes /No |
|----------------------|-----|----------------------|------|------|---------|-------------------------------|
| Severity Uncertainty | 358 | 0.67                 | 0.61 | 0.72 | <0.001  | Yes                           |
| Presence Uncertainty | 358 | 0.52                 | 0.44 | 0.59 | <0.001  | No                            |

**Hypothesis 41-42**

*Note – higher scores on MOS-SSS indicate greater social support; and higher scores on EDQ indicate greater disability so we would expect negative Spearman Correlation s here.*

Scores on the Social Support Scale will **not correlate ( $< 0.3$ )** with the PHYSICAL domain scores of the EDQ

| EDQ Domain        | N   | Spearman Correlation | LB    | UB    | p-value | Hypothesis confirmed? Yes /No |
|-------------------|-----|----------------------|-------|-------|---------|-------------------------------|
| Severity Physical | 357 | -0.35                | -0.43 | -0.25 | <0.001  | Yes                           |
| Presence Physical | 357 | -0.3                 | -0.39 | -0.2  | <0.001  | Yes                           |

**Hypothesis 43-44**

Scores on the Social Support Scale will **not correlate ( $< 0.3$ )** with the COGNITIVE domain scores of the EDQ

| EDQ Domain         | N   | Spearman Correlation | LB    | UB    | p-value | Hypothesis confirmed? Yes /No |
|--------------------|-----|----------------------|-------|-------|---------|-------------------------------|
| Severity Cognitive | 357 | -0.39                | -0.47 | -0.29 | <0.001  | Yes                           |
| Presence Cognitive | 357 | -0.38                | -0.47 | -0.29 | <0.001  | Yes                           |

**Hypothesis 45-46**

Scores on the Social Support Scale will **weakly correlate ( $\geq 0.3$ )** with the MENTAL-EMOTIONAL domain scores of the EDQ

| EDQ Domain                | N   | Spearman Correlation | LB    | UB    | p-value | Hypothesis confirmed? Yes /No |
|---------------------------|-----|----------------------|-------|-------|---------|-------------------------------|
| Severity Mental Emotional | 357 | -0.46                | -0.54 | -0.37 | <0.001  | Yes                           |
| Presence Mental Emotional | 357 | -0.42                | -0.5  | -0.33 | <0.001  | Yes                           |

**Hypothesis 47-48**

Scores on the Social Support Scale will **weakly correlate ( $\geq 0.3$ )** with the UNCERTAINTY domain scores of the EDQ

| EDQ Domain           | N   | Spearman Correlation | LB    | UB    | p-value | Hypothesis confirmed? Yes /No |
|----------------------|-----|----------------------|-------|-------|---------|-------------------------------|
| Severity Uncertainty | 357 | -0.33                | -0.42 | -0.24 | <0.001  | No                            |
| Presence Uncertainty | 357 | -0.23                | -0.32 | -0.12 | <0.001  | No                            |

**Hypothesis 49-52**

Scores on the Social Support Scale will **not correlate ( $< 0.3$ )** with the DIFFICULTIES WITH DAY-TO-DAY ACTIVITIES (Daily) domain scores of the EDQ

| EDQ Domain     | N   | Spearman Correlation | LB    | UB    | p-value | Hypothesis confirmed? Yes /No |
|----------------|-----|----------------------|-------|-------|---------|-------------------------------|
| Severity Daily | 357 | -0.32                | -0.41 | -0.22 | <0.001  | Yes                           |
| Presence Daily | 357 | -0.32                | -0.41 | -0.22 | <0.001  | Yes                           |
| Severity Daily | 357 | -0.32                | -0.41 | -0.22 | <0.001  | Yes                           |
| Presence Daily | 357 | -0.32                | -0.41 | -0.22 | <0.001  | Yes                           |

**Hypothesis 53-56**

Scores on the Social Support Scale will **weakly correlate ( $\geq 0.3$ )** with the SOCIAL domain scores of the EDQ

| EDQ Domain      | N   | Spearman Correlation | LB    | UB    | p-value | Hypothesis confirmed? Yes /No |
|-----------------|-----|----------------------|-------|-------|---------|-------------------------------|
| Severity Social | 357 | -0.48                | -0.56 | -0.4  | <0.001  | Yes                           |
| Presence Social | 357 | -0.47                | -0.55 | -0.38 | <0.001  | Yes                           |
| Severity Social | 357 | -0.48                | -0.56 | -0.4  | <0.001  | Yes                           |
| Presence Social | 357 | -0.47                | -0.55 | -0.38 | <0.001  | Yes                           |

**Hypothesis 57-68**

Participants who rated their General Health status (self-reported) better will have lower EDQ scores (presence and severity) compared with those who rated their health status as fair or poor. **General Health scores will be weakly correlated ( $\geq 0.30$ ) with EDQ presence and severity scores.**

| EDQ Domain                | N   | Spearman Correlation | LB   | UB   | p-value | Hypothesis confirmed? Yes /No |
|---------------------------|-----|----------------------|------|------|---------|-------------------------------|
| Severity Physical         | 357 | 0.63                 | 0.56 | 0.69 | <0.001  | No                            |
| Presence Physical         | 357 | 0.56                 | 0.49 | 0.63 | <0.001  | Yes                           |
| Severity Cognitive        | 357 | 0.48                 | 0.39 | 0.55 | <0.001  | Yes                           |
| Presence Cognitive        | 357 | 0.46                 | 0.37 | 0.54 | <0.001  | Yes                           |
| Severity Mental Emotional | 357 | 0.49                 | 0.41 | 0.57 | <0.001  | Yes                           |
| Presence Mental Emotional | 357 | 0.44                 | 0.35 | 0.52 | <0.001  | Yes                           |
| Severity Uncertainty      | 357 | 0.48                 | 0.39 | 0.55 | <0.001  | Yes                           |
| Presence Uncertainty      | 357 | 0.36                 | 0.27 | 0.45 | <0.001  | No                            |
| Severity Daily            | 357 | 0.61                 | 0.54 | 0.67 | <0.001  | No                            |
| Presence Daily            | 357 | 0.61                 | 0.54 | 0.67 | <0.001  | No                            |
| Severity Social           | 357 | 0.56                 | 0.48 | 0.63 | <0.001  | Yes                           |
| Presence Social           | 357 | 0.53                 | 0.45 | 0.6  | <0.001  | Yes                           |

**Hypotheses 69-80**

**Participants with 2 or more concurrent health conditions will have higher total EDQ presence scores and severity scores (n=353 participants)**

These hypotheses were tested at the first assessment with a one-sided hypothesis test for a Spearman Correlation of COMTot and scale/domain total (Rasch) score greater than zero.

| Score                     | Spearman | p-value | Hypothesis confirmed? Yes /No |
|---------------------------|----------|---------|-------------------------------|
| Severity Physical         | 0.67     | <0.001  | Yes                           |
| Presence Physical         | 0.61     | <0.001  | Yes                           |
| Severity Cognitive        | 0.49     | <0.001  | Yes                           |
| Presence Cognitive        | 0.50     | <0.001  | Yes                           |
| Severity Mental Emotional | 0.44     | <0.001  | Yes                           |
| Presence Mental Emotional | 0.37     | <0.001  | Yes                           |
| Severity Uncertainty      | 0.45     | <0.001  | Yes                           |
| Presence Uncertainty      | 0.33     | <0.001  | Yes                           |
| Severity Daily            | 0.67     | <0.001  | Yes                           |
| Presence Daily            | 0.68     | <0.001  | Yes                           |
| Severity Social           | 0.54     | <0.001  | Yes                           |
| Presence Social           | 0.53     | <0.001  | Yes                           |
